# Supplementary material for: Understanding the crystallization behavior of as-deposited Ti–Sb–Te alloys through real-time radial distribution functions
Source: Royal Society of Chemistry journal article supplement (doi:10.1039/c4nr07408d), 2015-01-01
Supplement: c4nr07408d1.pdf [file c4nr07408d1.pdf]

## Supporting Information

### **Understanding the Crystallization Behavior of As-Deposited Ti-Sb- Te Alloy through Real-Time Radial Distribution Function**

*Min Zhu\*, Mengjiao Xia, Zhitang Song\*, Yan Cheng, Liangcai Wu, Feng Rao, Sannian Song, Miao Wang, Yegang Lu and Songlin Feng*

*Dr. Min Zhu\*, Dr. Mengjiao Xia, Prof. Zhitang Song\*, Associate Prof. Yan Cheng, Prof. Liangcai Wu, Associate Prof. Feng Rao, Associate Prof. Sannian Song and Prof. Songlin Feng*

State Key Laboratory of Functional Materials for Informatics, Shanghai Institute of Micro-system and Information Technology, Chinese Academy of Sciences, Shanghai 200050, China.

E-mail: minzhu@mail.sim.ac.cn, ztsong@mail.sim.ac.cn

Dr. Miao Wang, Dr. Yegang Lu  
Faculty of Information Science and Engineering, Ningbo University, Ningbo 315211, China.

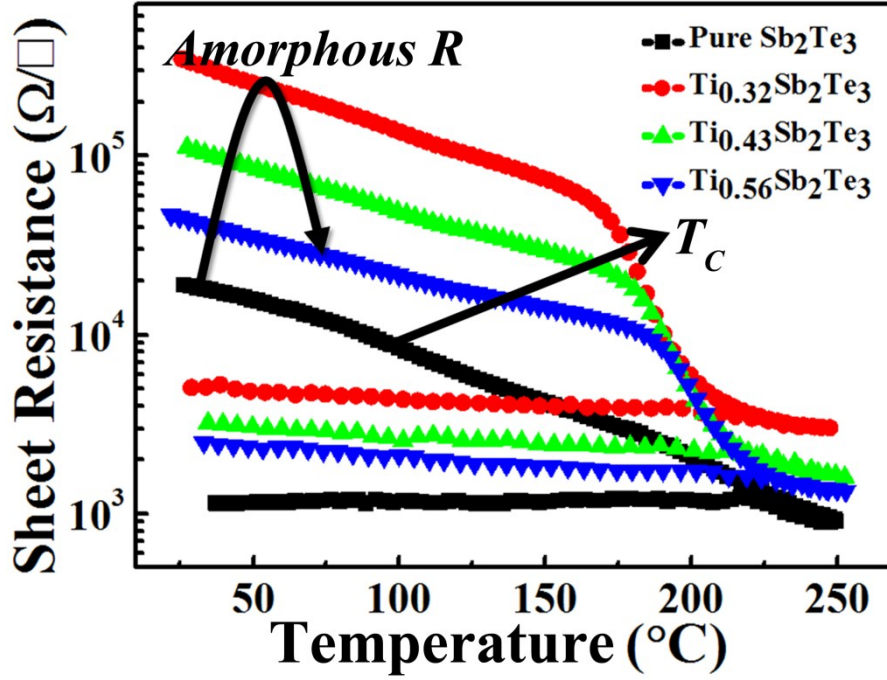

**Figure S1** Sheet resistance as a function of temperature for Sb<sub>2</sub>Te<sub>3</sub> and Ti doped Sb<sub>2</sub>Te<sub>3</sub> films. The experiments were carried out by Linkan LMP 95 hot stage. As shown in this figure, with the increase of annealing temperature, a slow and gradual drop of sheet resistance ( $R_s$ ) is observed for as-deposited ST film. This is because that the ST film has partly crystallized during the sputtering process due to its low  $T_c$  (< 100 °C). Unlike the  $RT$  curve for ST, after initially monotonic decrease, sudden drops of  $R_s$ , corresponding to  $T_c$ , happens at 175.6 °C, 185.5 °C and 195.9 °C for T<sub>0.32</sub>ST, T<sub>0.43</sub>ST and T<sub>0.56</sub>ST, respectively. These values are much higher than that of pure ST and conventional GST (~150 °C). The high  $T_c$  can inhibit the spontaneous crystallization and make the amorphous state more stable.

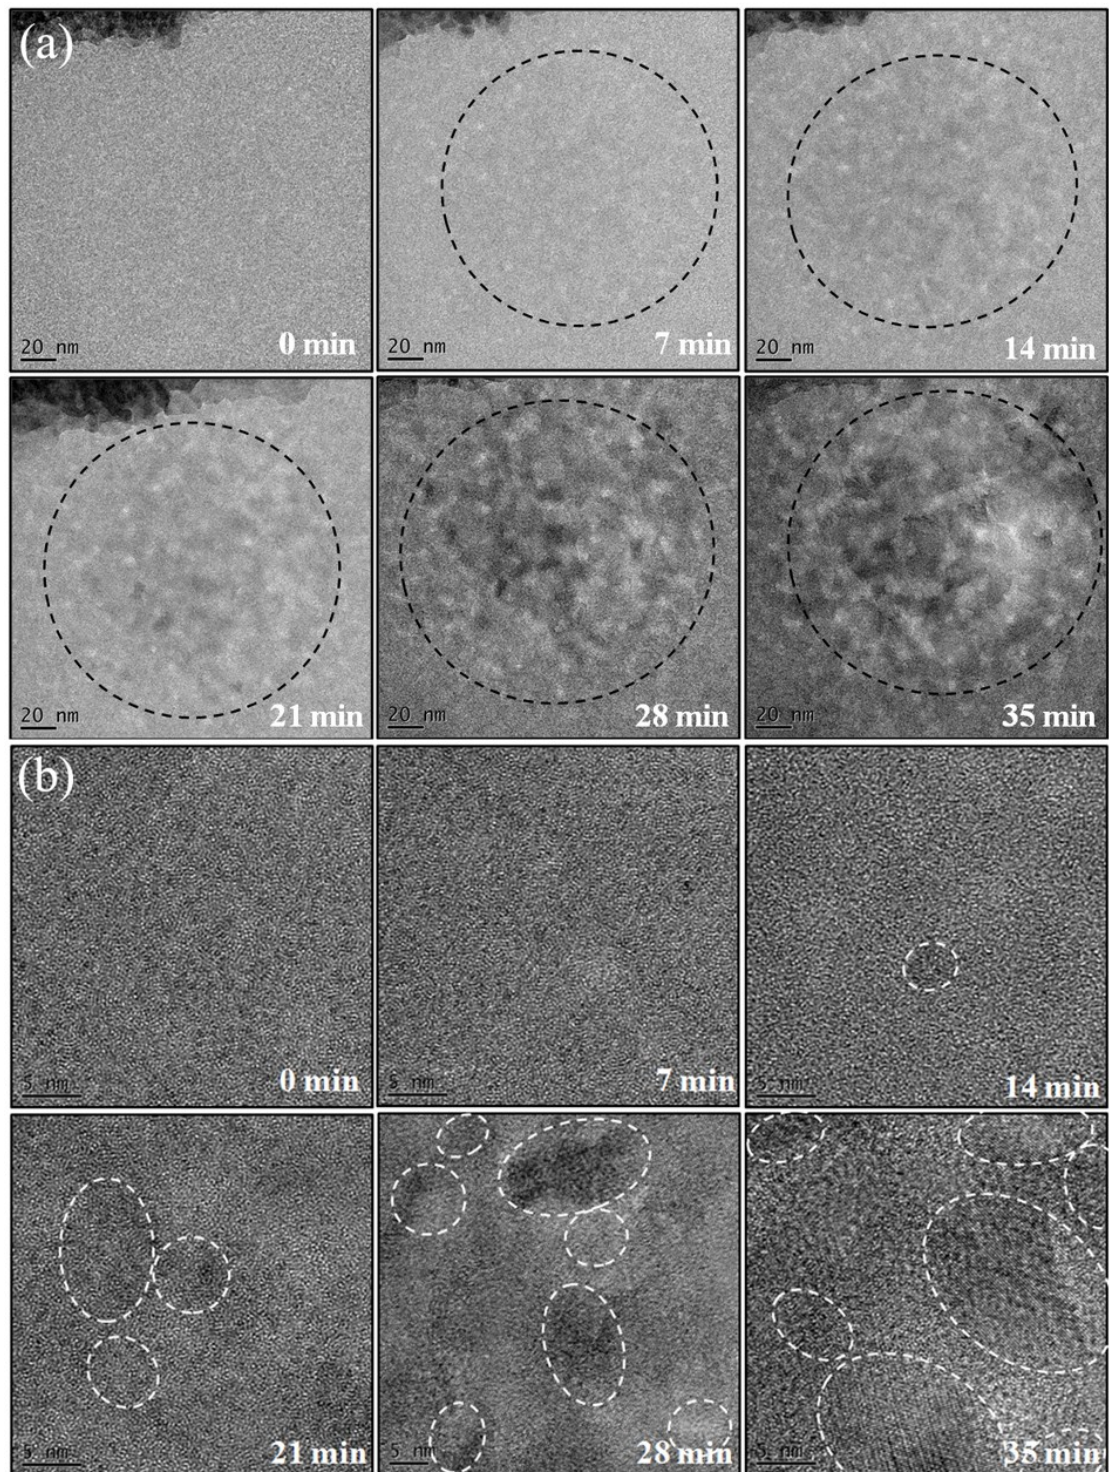

a margin location of the film is used (identified by dark region in the top left corner). From the figure, we can see that, before electron irradiation, the as-deposited film is amorphous without any lattice, and the surface is very smooth and uniform. After irradiating for 7 minutes, no difference is observed in the morphology. First visible change is found under irradiation for 14 minutes, when some domains of the  $a_{ei}$  becomes dark, especially in the center. As the irradiation time goes on, the contrast between the  $a_{ei}$  and surrounding becomes more and more obvious, and the central dark area expands outwards the non-irradiation region. From the HRTEM images of the  $a_{ei}$ , we can find the reasons for the morphology evolution. No lattice fringe is observed before 14-minutes of electron irradiation. However, after then, elliptic-shaped nanoparticles of various sizes appear. Under longer electron irradiation, the grains get larger and more grains come into sight. Thus, the GST film is crystallized under the long-time electron irradiation, and the appearance of grains is responsible for the morphology evolution. It is necessary to state that the area in HRTEM images is not the same because that it's too small to be located in a limit time, while long time exposure to electrons would cause the crystallization of the film.
